# Supplementary material for: Diagnostic Utility and Pathogenic Role of Circulating MicroRNAs in Vasospastic Angina
Source: PubMed Central journal article supplement (PMC7290712; doi:10.3390/jcm9051313), 2020-05-02
Supplement: jcm-09-01313-s001.pdf [file jcm-09-01313-s001.pdf]

## Supplementary material

**Figure S1.** Distinction of patients according to miR profile between VA group and other groups

### VA vs. AA and ICL

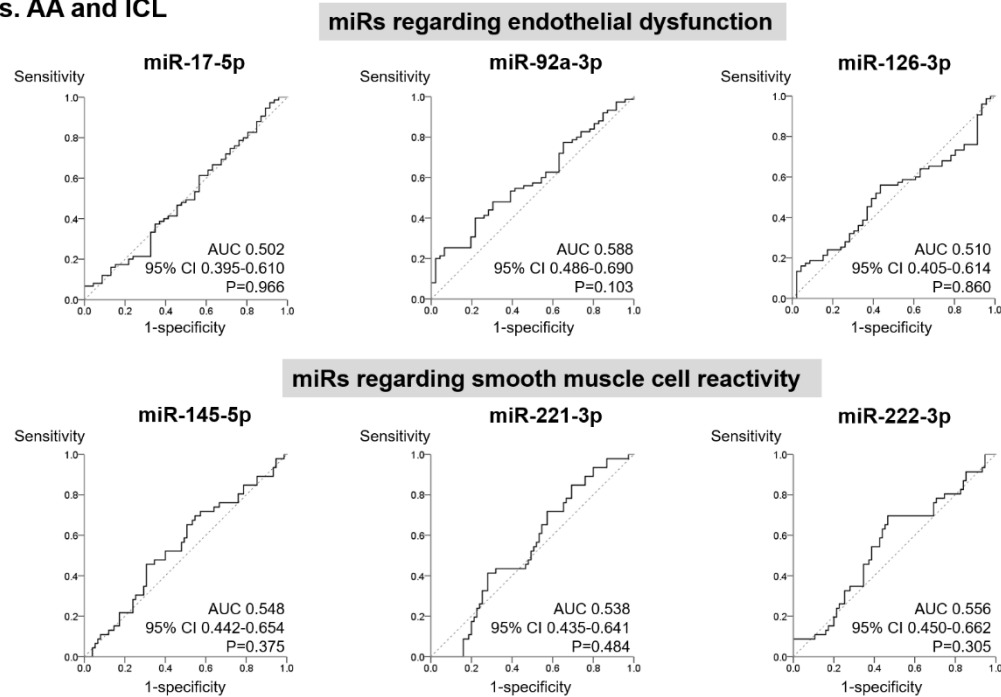

In receiver operating characteristics curve analysis, the area under the curve and 95% confidence interval were calculated.

VA: Vasospastic angina, miR: MicroRNA

**Figure S2.** The role of miRs in endothelial eNOS and KLF2 protein expression

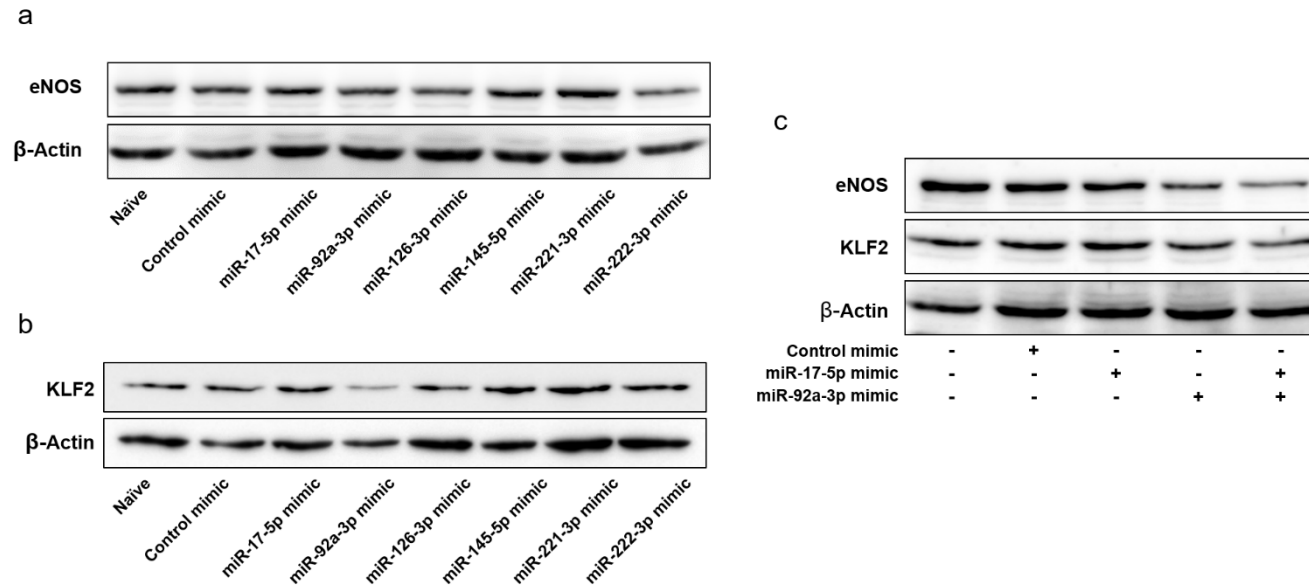

Western blot of eNOS after pre-miR transfection (A), western blot of KLF2 after pre-miR transfection (B), and western blot of eNOS and KLF2 after pre-miR-17-5p and pre-miR-92a-3p cotransfection (C).

eNOS, KLF2, and  $\beta$ -actin were analyzed in each single gel without cropping.

eNOS, endothelial nitric oxide synthase; miR, microRNA

**Figure S3.** eNOS protein expression in hCAECs after LPS treatment

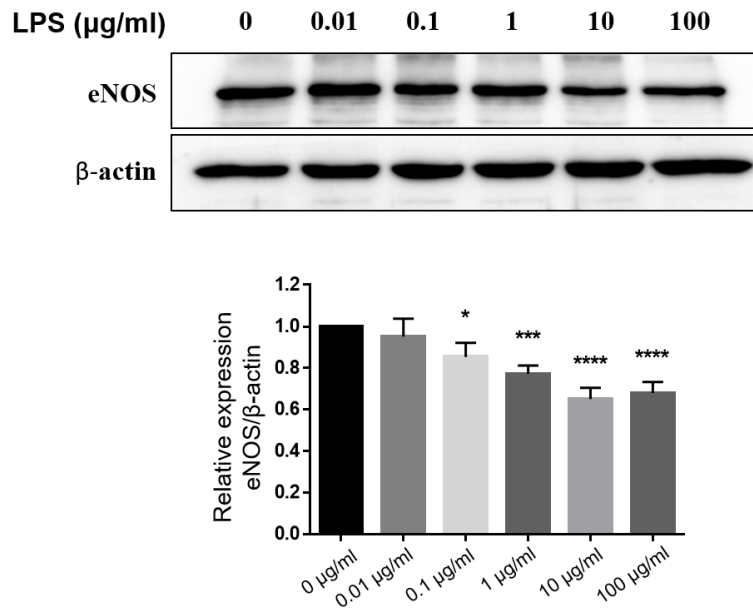

Western blot and densitometry of eNOS after LPS treatment. eNOS and β-actin were analyzed in each single gel without cropping.

One-way analysis of variance was applied and data are presented as mean ± standard deviation.

\* indicates  $p < 0.05$ , \*\* indicates  $p < 0.01$ , \*\*\* indicates  $p < 0.001$ , and \*\*\*\* indicates  $p < 0.001$ .

eNOS, endothelial nitric oxide synthase; hCAEC, human coronary artery endothelial cell; LPS, lipopolysaccharide

**Figure S4.** The role of miR modulation in eNOS protein expression in hCAECs treated with LPS

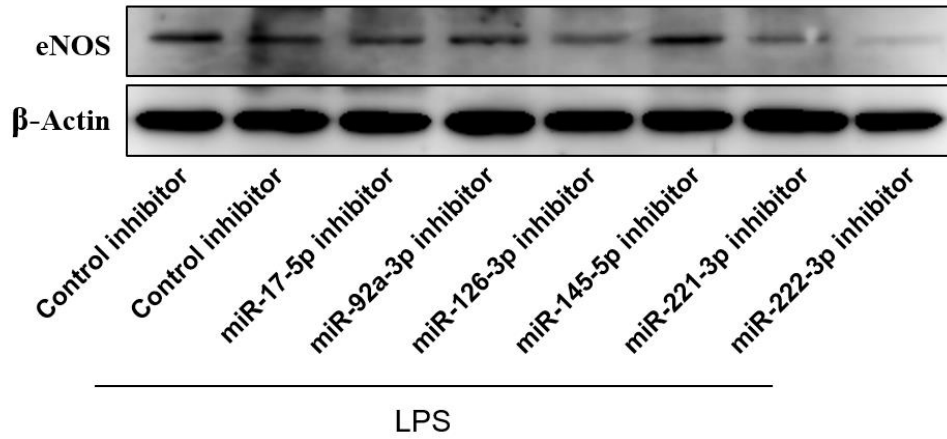

Western blot of eNOS after transfection of each antago-miRs. eNOS, and  $\beta$ -actin were analyzed in each single gel without cropping.

eNOS, endothelial nitric oxide synthase; hCAECs, human coronary artery endothelial cell; LPS, lipopolysaccharide; miR, microRNA.



**Table S1.** Primer sequence

| <b>Primer</b>  | <b>Sequence</b>                 |
|----------------|---------------------------------|
| eNOS forward   | 5'-GAAGGCTTTTGATCCCCGGGTCCTG-3' |
| eNOS reverse   | 5'-CAGTTCCTCCAGCCGTGTGTCCAC-3'  |
| RNU6           | 5'-CGCAAGGATGACACGCAAATTC-3'    |
| Hsa-miR-17-3p  | 5'-CAAAGUGCUUACAGUGCAGGUAG-3'   |
| Hsa-miR-92a-3p | 5'-UAUUGCACUUGUCCCGGCCUGU-3'    |
| Hsa-miR-126-3p | 5'-UCGUACCGUGAGUAAUAAUGCG-3'    |
| Hsa-miR-145-5p | 5'-GUCCAGUUUCCCCAGGAAUCCCU-3'   |
| Hsa-miR-221-3p | 5'-AGCUACAUUGUCUGCUGGGUUUC-3'   |
| Hsa-miR-222-3p | 5'-CUCAGUAGCCAGUGUAGAUCU-3'     |
| Ce-miR-39-3p   | 5'-UCACCGGGUGUAAAUCAGCUUG-3'    |

miR, microRNA

**Table S2.** Plasma miRNA levels at baseline detected by RT-qPCR.

| Risk factors | Ct value by RT-qPCR |          |          |          |          |          |              |
|--------------|---------------------|----------|----------|----------|----------|----------|--------------|
|              | miR-17              | miR-92   | miR-126  | miR-145  | miR-221  | miR-222  | c-elegans-39 |
| Total        | 33.4±3.3            | 29.4±4.3 | 31.9±3.2 | 33.9±3.3 | 33.5±3.6 | 33.0±3.9 | 31.5±4.7     |
| VA           | 32.9±3.6            | 28.2±4.4 | 31.5±3.4 | 33.8±4.1 | 33.3±3.9 | 33.0±4.4 | 31.1±4.9     |
| AA           | 34.4±2.7            | 31.1±3.6 | 32.8±2.4 | 34.4±2.5 | 34.2±2.8 | 33.7±3.2 | 33.3±3.6     |
| ICL          | 32.5±3.7            | 28.1±4.4 | 31.1±3.7 | 32.9±3.0 | 32.3±4.0 | 31.7±3.9 | 28.7±4.7     |

AA, atherothrombotic angina; Ct, threshold cycle; miR, microRNA; ICL, insignificant coronary lesion; RT-qPCR, reverse transcription-quantitative real-time polymerase chain reaction; VA, vasospastic angina
